# Supplementary material for: Intracranial Solitary Fibrous Tumour Management: A French Multicentre Retrospective Study
Source: MDPI journal article supplement (doi:10.3390/cancers15030704), 2023-01-24
Supplement: s1 [file s1]

**Table S1.** Initial symptoms in patients with newly diagnosed iSFT.

| <b>Initial symptoms (N=88)</b>               | <b>n (%)</b> |
|----------------------------------------------|--------------|
| <b>Time between symptoms and diagnosis:</b>  |              |
| <1 month                                     | 29 (33%)     |
| 1-3 months                                   | 14 (16%)     |
| 3-6 months                                   | 16 (18%)     |
| >6 months                                    | 21 (24%)     |
| Not available                                | 8 (9%)       |
| <b>Signs of raised intracranial pressure</b> |              |
| Yes                                          | 23 (26%)     |
| No                                           | 62 (70%)     |
| Not available                                | 3 (3%)       |
| <b>Motor deficit</b>                         |              |
| Yes                                          | 19 (22%)     |
| No                                           | 66 (75%)     |
| Not available                                | 3 (3%)       |
| <b>Sensory deficit</b>                       |              |
| Yes                                          | 8 (9%)       |
| No                                           | 77 (88%)     |
| Not available                                | 3 (3%)       |
| <b>Epileptic seizures</b>                    |              |
| Yes                                          | 14 (16%)     |
| No                                           | 71 (81%)     |
| Not available                                | 3 (3%)       |
| <b>Cognitive disorder</b>                    |              |
| Yes                                          | 37 (42%)     |
| No                                           | 48 (55%)     |
| Not available                                | 3 (3%)       |
| <b>Visual disorder</b>                       |              |
| Yes                                          | 24 (27%)     |
| No                                           | 61 (69%)     |
| Not available                                | 3 (3%)       |
| <b>Cerebellar syndrome</b>                   |              |
| Yes                                          | 14 (16%)     |
| No                                           | 72 (82%)     |
| Not available                                | 2 (2%)       |
| <b>Headache</b>                              |              |
| Yes                                          | 41 (47%)     |
| No                                           | 44 (50%)     |
| Not available                                | 3 (3%)       |

**Table S2.** Clinical characteristics and medical strategies in patients with distant iSFT.

| <b>Characteristics (N=16)</b>                  | <b>n (%)</b> |
|------------------------------------------------|--------------|
| <b>Lung metastasis</b>                         | 6 (38%)      |
| <b>Bone metastasis</b>                         | 9 (56%)      |
| <b>Liver metastasis</b>                        | 5 (31%)      |
| <b>Other metastasis</b>                        | 6 (38%)      |
| <b>Number of metastasis sites</b>              |              |
| 1 site                                         | 10 (63%)     |
| 2 sites                                        | 3 (19%)      |
| 3 sites                                        | 2 (13%)      |
| 4 sites                                        | 1 (6%)       |
| <b>Type of systemic treatment</b>              |              |
| Chemotherapy                                   | 5 (31%)      |
| Targeted therapy                               | 2 (13%)      |
| Chemotherapy + targeted therapy                | 1 (6%)       |
| None                                           | 5 (31%)      |
| Not available                                  | 3 (19%)      |
| <b>Metastasis surgery</b>                      |              |
| Yes                                            | 8 (50%)      |
| No                                             | 7 (44%)      |
| Not available                                  | 1 (6%)       |
| <b>Radiotherapy of metastasis</b>              |              |
| Yes                                            | 4 (25%)      |
| No                                             | 11 (69%)     |
| Not available                                  | 1 (6%)       |
| <b>Best response with metastatic treatment</b> |              |
| Complete response                              | 5 (31%)      |
| Partial response                               | 0 (0%)       |
| Stable disease                                 | 6 (38%)      |
| Progression disease                            | 3 (19%)      |
| Not available                                  | 2 (13%)      |
